# Supplementary material
Source: HighWire-hosted journal article supplement (https://cmaj.ca/highwire/filestream/149707/field_highwire_adjunct_files/0/230492-res-1-at.pdf)
Supplement: 230492-res-1-at.pdf [file 230492-res-1-at.pdf]

**Appendix 1.** Description of virtual urgent care services offered by 14 emergency department led programs in Ontario.

Funding allocation, site selection and approval were overseen by an Ontario Health Virtual Care Secretariat, which set program funding criteria and evaluated proposals endorsed by five Ontario Health Regions (Toronto, Central, East, West, and North). Hospital organizations interested in establishing a VUC service submitted a funding application to Ontario Health with their proposed pilot program design to address local community needs. Each proposal was reviewed by the local Ontario Health region and the provincial Virtual Care Secretariat in an iterative manner. Feedback was shared with the pilot program leads regarding proposed pilot program design and implementation considerations related to triage, staffing model, technology use, program leadership, and hours of service. Each application underwent two or three rounds of consideration by Ontario Health prior to funding approval. Programs were expected to launch their services within one to two months of funding approval to help alleviate healthcare access pressures secondary to the global pandemic.

Sites were responsible for designing and implementing their VUC programs in accordance with the overall funding program objectives. There were no specific directives given by Ontario Health or the Ministry of Health in terms of VUC program design specifications. As a result, the clinical and operational governance, technology, staffing, patient engagement, and VUC services offered varied based on the specific use case of each local institution. As part of the conditions to receive provincial program funding, sites were required to contribute to a provincial evaluation including monthly secure data transfer of standardized reporting metrics related to patient presentations and reasons for use, volumes, and patient-reported outcomes and attend monthly provincial evaluation meetings.

The design and implementation of the 14 different ED-led virtual sites has been described elsewhere <9,10>, but sites had various start dates, operating hours, screening, and staffing models. Each site posted a list of presenting complaints which would be suitable for virtual urgent care, and those that would not be appropriate for virtual care and should be assessed in-person. Most sites allowed patients to self-screen using these lists. Six sites had a triage nurse or nurse practitioner review the presenting complaint and if it was believed the patient required an in-person assessment, they were re-directed to the closest ED. All virtual urgent care patients were assessed by a physician.

| Site Name                                    | UHN              | HSN              | LHSC                                        | SHSC                                        | SickKids                                    | CHEO                                        | Unity Health                                | SJHH                | HRH                 | LTC-CARES           | Lakeridge                                       | WOHS                                        | TBRHSC                                      | LACGH                                       |
|----------------------------------------------|------------------|------------------|---------------------------------------------|---------------------------------------------|---------------------------------------------|---------------------------------------------|---------------------------------------------|---------------------|---------------------|---------------------|-------------------------------------------------|---------------------------------------------|---------------------------------------------|---------------------------------------------|
| Geographic location                          | Toronto          | Sudbury          | London                                      | Toronto                                     | Toronto                                     | Ottawa                                      | Toronto                                     | Hamilton            | North York          | Hamilton            | Oshawa                                          | Brampton                                    | Thunder Bay                                 | Napanee                                     |
| Total VUC visits                             | 1445             | 1681             | 3301                                        | 1567                                        | 744                                         | 4030                                        | 642                                         | 2271                | 1488                | 79                  | 3024                                            | 974                                         | 851                                         | 181                                         |
| How do patients access VUC                   | Online and Phone | Online           | Online and Phone                            | Online and Phone                            | Online                                      | Online and Phone                            | Online and Phone                            | Online              | Online              | Phone               | Online                                          | Online                                      | Online                                      | Online                                      |
| Name of EMR used                             | Quadramed        | Meditech         | Cerner                                      | SunnyCare                                   | Epic                                        | Epic                                        | Cerner (Soarian)                            | Epic                | Meditech            | Meditech            | Epic                                            | Meditech                                    | Meditech                                    | Aetonix                                     |
| Triage process                               | NP               | Triage Nurse     | Patient self screen using a symptom checker | Patient self screen using a symptom checker | Patient self screen using a symptom checker | Patient self screen using a symptom checker | Patient self screen using a symptom checker | Triage Nurse        | Triage Nurse        | NP                  | Triage Nurse                                    | Patient self screen using a symptom checker | Patient self screen using a symptom checker | Patient self screen using a symptom checker |
| Scheduling platform                          | Inhouse platform | Inhouse platform | Verto                                       | Inhouse platform                            | Andor Health                                | Epic (in house)                             | Verto                                       | Epic (in house)     | Meditech ADT        | N/A                 | N/A                                             | Savience                                    | Caredove                                    | Inhouse platform                            |
| VUC visit modality                           | Video and Phone  | Video            | Video, Phone backup                         | Video, Phone backup                         | Video, Phone backup                         | Video                                       | Video and phone                             | Video, Phone backup | Video               | Primarily phone     | Video and phone                                 | Video                                       | Video, Phone backup                         | Video                                       |
| Video platform                               | MS Teams         | OTN              | WebEx                                       | Zoom®                                       | WebRTC, MS Teams                            | Zoom®                                       | Zoom                                        | Zoom                | MS Teams            | Zoom                | MS Teams                                        | Zoom                                        | WebEx                                       | Aetonix                                     |
| VUC provider                                 | ED physician     | ED physician     | ED physician                                | ED physician                                | ED physician                                | ED physician                                | ED physician                                | ED physician        | ED physician        | ED physician        | ED physician                                    | ED physician                                | ED physician                                | ED physician                                |
| Hours of virtual care availability           | 2pm-9pm Mon-Fri  | 10am-6pm Mon-Fri | 3pm-7pm 7 days/week                         | 2pm-9pm Mon-Fri                             | 9am-1am 7 days/week                         | 1pm-9pm 7 days/week                         | 2pm-9pm Mon-Fri                             | 12pm-6pm Mon-Fri    | 5pm-9pm 7 days/week | 9am-9pm 7 days/week | 9am-5pm Mon-Fri<br>10am-2pm weekends & holidays | 9am-5pm Mon-Fri<br>10am-4pm weekends        | 12pm-6pm Mon-Fri                            | 8am-4pm 7 days/week                         |
| Access to community imaging or lab orders?   | No               | Yes              | No                                          | Yes                                         | No                                          | No                                          | No                                          | No                  | No                  | Yes                 | Yes                                             | No                                          | Yes                                         | No                                          |
| Access to elective hospital imaging?         | No               | Yes              | No                                          | Yes                                         | No                                          | Yes                                         | Yes                                         | No                  | Yes                 | Yes                 | Yes                                             | Yes                                         | Yes                                         | Yes                                         |
| Access to previous medical record?           | Yes              | Yes              | Yes                                         | Yes                                         | Yes                                         | Yes                                         | Yes                                         | Yes                 | Yes                 | Yes                 | No                                              | Yes                                         | Yes                                         | Yes                                         |
| VUC service offered remotely or in-hospital? | Both             | In-hospital      | offsite                                     | Offsite                                     | offsite                                     | Both                                        | Both                                        | Offsite             | Both                | Offsite             | Both                                            | Offsite                                     | Offsite                                     | Both                                        |

Where: UHN=University Health Network; HSN=Health Sciences North; LHSC=London Health Sciences Centre; SHSC=Sunnybrook Health Sciences Centre; SJHH=St. Joseph’s Healthcare Hamilton; HRH=Humber River Hospital; LTC-CARES=Long-Term Care Consults and Recommendations for Emergency & Support Services; Lakeridge=Lakeridge Health; WOHS=William Osler Health System; TBRHSC=Thunder Bay Regional Health Sciences Centre; LACGH=Lennox and Addington County General Hospital; VUC=Virtual Urgent Care; EMR=Electronic Medical Record; NP=Nurse Practitioner; ED=Emergency Department.
